# Supplementary material for: Growth of freestanding GaN crystals on three-dimensional mesh porous substrates by HVPE
Source: Royal Society of Chemistry journal article supplement (doi:10.1039/d4ce00726c), 2024-01-01
Supplement: d4ce00726c1.pdf [file d4ce00726c1.pdf]

**Table 1. Parametric Conditions for High Temperature Molten Alkali Corrosion**

| Sample | Molten Alkali Temperature(°C) | Corrosion Time (s) |
|--------|-------------------------------|--------------------|
| 1      | 300                           | 30                 |
| 2      | 300                           | 120                |
| 3      | 300                           | 240                |
| 4      | 320                           | 30                 |
| 5      | 340                           | 30                 |

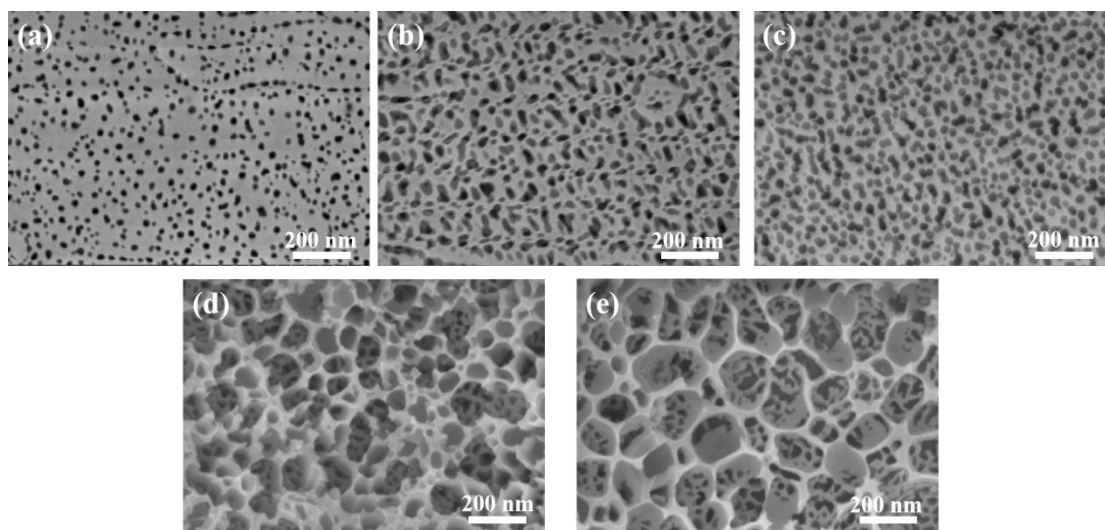

**Figure S1.** SEM images of the surface of porous GaN substrate obtained by etching time 10 min with different etching voltages (a) 7V, (b) 10V, (c) 15V, (d) 20V, (e) 25V.

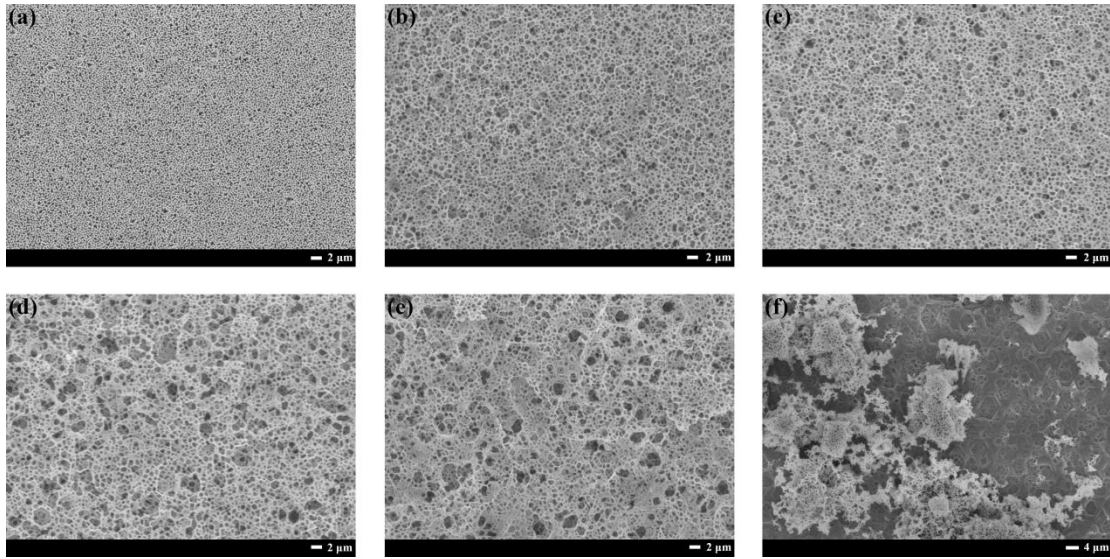

**Figure S2.** SEM images of MOCVD-GaN/sapphire substrate after ECE (a) and further etching by molten alkali under different conditions (b) 300 °C for 30 s; (c) 320 °C for 30 s; (d) 340 °C for 30 s; (e) 300 °C for 2 min; (f) 300 °C for 4 min.

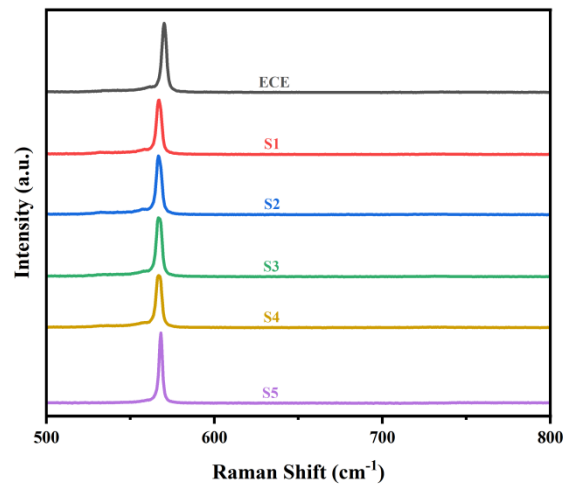

**Figure S3.** Raman spectra of samples under different etching conditions.
